# Supplementary material for: The oncometabolite R-2-hydroxyglutarate dysregulates the differentiation of human mesenchymal stromal cells via inducing DNA hypermethylation
Source: BMC Cancer. 2021 Jan 7;21:36. doi: 10.1186/s12885-020-07744-x (PMC7791852; doi:10.1186/s12885-020-07744-x)
Supplement: Supplementary file 2 — Additional file 2. [file 12885_2020_7744_MOESM2_ESM.xls]

## Sheet: Sheet1
Target_ID	s1.AVG_Beta	s2.AVG_Beta	CHR	UCSC_REFGENE_NAME		betadif-1	betadif-2	s1.AVG_Beta	s1.AVG_Beta	s2.AVG_Beta	s2.AVG_Beta
cg26027669	0.0753852	0.989176	1	GFI1;GFI1		0.913791	0.893791	0.0753852	0.0693852	0.989176	0.963176
cg04707327	0.209181	0.98167	14	KLHDC1		0.772489	0.832489	0.209181	0.229181	0.98167	0.99397
cg13064658	0.123494	0.780604	1	LPGAT1;LPGAT1		0.65711	0.72711	0.123494	0.133494	0.780604	0.860604
cg10949007	0.0521516	0.415989	5	GLRX;GLRX		0.363838	0.403838	0.0521516	0.0501516	0.415989	0.453989
cg02902672	0.498901	0.799373	6	HLA-DQB1		0.300472	0.290472	0.498901	0.558901	0.799373	0.849373
cg05768983	0.012395	0.295646	4	HAUS3		0.283251	0.243251	0.012395	0.012895	0.295646	0.256146
cg18938907	0.638485	0.917373	1	GSTM1;GSTM1;GSTM1;GSTM1		0.278888	0.308888	0.638485	0.578485	0.917373	0.887373
cg05100017	0.282961	0.541799	6	GRM4		0.258838	0.248838	0.282961	0.292961	0.541799	0.541799
cg23149560	0.176801	0.408805	2	MOBKL1B		0.232004	0.242004	0.176801	0.196801	0.408805	0.438805
cg14024415	0.350172	0.579777	12	GEFT;GEFT		0.229605	0.219605	0.350172	0.340172	0.579777	0.559777
cg18457433	0.150992	0.377103	8	RUNX1T1;RUNX1T1;RUNX1T1		0.226111	0.216111	0.150992	0.170992	0.377103	0.387103
cg18138788	0.170842	0.394047	X	MAOA		0.223205	0.233205	0.170842	0.190842	0.394047	0.424047
cg08319019	0.22316	0.443374	2	IKZF2		0.220215	0.230215	0.22316	0.20316	0.443374	0.433374
cg07674520	0.291841	0.508143	X	HDAC6		0.216302	0.226302	0.291841	0.291841	0.508143	0.518143
cg07172565	0.646888	0.85963	18	TCEB3CL;TCEB3C;KATNAL2		0.212742	0.202742	0.646888	0.756888	0.85963	0.95963
cg01179696	0.714716	0.925497	3	ECE2;ECE2;ECE2;ECE2		0.210781	0.220781	0.714716	0.604716	0.925497	0.825497
cg21754746	0.375871	0.584101	6	WDR46;WDR46;PFDN6		0.20823	0.22823	0.375871	0.365871	0.584101	0.594101
cg11223816	0.128378	0.336524	4	USO1;USO1		0.208146	0.188146	0.128378	0.138378	0.336524	0.326524
cg05287206	0.12412	0.330229	19	C19orf62;C19orf62		0.206109	0.196109	0.12412	0.12912	0.330229	0.325229
cg00658016	0.0854592	0.291092	3	PIK3CA		0.205633	0.156331	0.0854592	0.0834592	0.291092	0.23979
cg08134859	0.262557	0.466303	12	NACA;NACA;NACA;NACA		0.203746	0.163746	0.262557	0.252557	0.466303	0.416303
cg21474964	0.202417	0.405636	3	ZBTB11;LOC100009676		0.203219	0.263219	0.202417	0.222417	0.405636	0.485636
cg10769535	0.477723	0.675079	1	DNM3;DNM3;MIR199A2		0.197356	0.237356	0.477723	0.387723	0.675079	0.625079
cg10069353	0.199515	0.396204	12	RPL41;RPL41		0.196689	0.186689	0.199515	0.239515	0.396204	0.426204
cg08778681	0.01311	0.20905	X	RBMX2		0.19594	0.20594	0.01311	0.01711	0.20905	0.22305
cg21504064	0.219937	0.41512	17	NBR1;TMEM106A;NBR1;NBR1		0.195183	0.185183	0.219937	0.209937	0.41512	0.39512
cg19250304	0.446647	0.640519	10	PITRM1		0.193872	0.183872	0.446647	0.416647	0.640519	0.600519
cg14838188	0.142012	0.331789	10	C10orf26		0.189777	0.199777	0.142012	0.182012	0.331789	0.381789
cg15590153	0.465775	0.655137	1	PGM1		0.189363	0.199363	0.465775	0.355775	0.655137	0.555137
cg12486814	0.0869318	0.273622	1	C1orf192		0.18669	0.18869	0.0869318	0.0879318	0.273622	0.276622
cg24414182	0.194231	0.375966	19	MYADM;MYADM;MYADM		0.181735	0.184735	0.194231	0.198231	0.375966	0.382966
cg12858593	0.0747306	0.25523	8	PIWIL2;PIWIL2		0.1805	0.1835	0.0747306	0.0707306	0.25523	0.25423
cg22816909	0.330902	0.511189	1	B4GALT2;CCDC24;B4GALT2		0.180287	0.175287	0.330902	0.334902	0.511189	0.510189
cg04636967	0.212439	0.392405	10	DMBT1;DMBT1;DMBT1		0.179966	0.169966	0.212439	0.202439	0.392405	0.372405
cg27347523	0.3371	0.516381	19	SIGLEC5		0.179281	0.189281	0.3371	0.3271	0.516381	0.516381
cg15340644	0.162209	0.341488	19	IER2;STX10		0.179279	0.170279	0.162209	0.172209	0.341488	0.342488
cg02288777	0.0941939	0.273096	1	PEF1		0.178903	0.181903	0.0941939	0.194194	0.273096	0.376096
cg07173877	0.135789	0.313106	2	PPM1B;PPM1B;PPM1B;PPM1B;PPM1B		0.177317	0.167317	0.135789	0.139789	0.313106	0.307106
cg14678442	0.101093	0.277249	17	NOG;NOG		0.176156	0.166156	0.101093	0.100093	0.277249	0.266249
cg11493241	0.0928571	0.268033	1	RBMXL1;CCBL2;CCBL2;RBMXL1;RBMXL1;CCBL2;RBMXL1;CCBL2		0.175176	0.185176	0.0928571	0.0948571	0.268033	0.280033
cg05567294	0.239781	0.414872	19	SLC44A2		0.175091	0.185091	0.239781	0.269781	0.414872	0.454872
cg00320625	0.354451	0.528221	6	MRPS18B;PPP1R10		0.17377	0.18377	0.354451	0.384451	0.528221	0.568221
cg05855489	0.240461	0.409991	10	C10orf26		0.16953	0.170953	0.240461	0.220461	0.409991	0.391414
cg08463929	0.156312	0.325346	6	FBXO5;FBXO5		0.169034	0.165034	0.156312	0.136312	0.325346	0.301346
cg25580254	0.219254	0.386701	12	SLC2A3		0.167447	0.160447	0.219254	0.239254	0.386701	0.399701
cg23864202	0.121011	0.286133	14	BDKRB1		0.165121	0.161121	0.121011	0.151011	0.286133	0.312133
cg14629010	0.312258	0.477304	X	ZNF157		0.165046	0.167005	0.312258	0.342258	0.477304	0.509263
cg07697134	0.165493	0.329884	19	C19orf62;C19orf62		0.164391	0.166391	0.165493	0.175493	0.329884	0.341884
cg09219182	0.349636	0.513761	22	NCF4;NCF4		0.164126	0.166126	0.349636	0.329636	0.513761	0.495761
cg02288017	0.190222	0.353138	X	CXorf15;CXorf15		0.162917	0.166917	0.190222	0.210222	0.353138	0.377138
cg01217666	0.0442215	0.206648	12	TMEM194A;TMEM194A		0.162427	0.165427	0.0442215	0.0441215	0.206648	0.209548
cg10939579	0.325744	0.488073	13	GJB2		0.162329	0.164329	0.325744	0.325944	0.488073	0.490273
cg17700139	0.14485	0.307061	X	IRS4		0.16221	0.16321	0.14485	0.14685	0.307061	0.310061
cg16555806	0.122064	0.28386	5	TMEM167A;XRCC4;XRCC4;XRCC4		0.161796	0.160796	0.122064	0.124064	0.28386	0.28486
cg17858100	0.190889	0.352676	1	YOD1		0.161786	0.160786	0.190889	0.192889	0.352676	0.353676
cg09015246	0.128577	0.289552	16	CIITA;CIITA		0.160975	0.158975	0.128577	0.126577	0.289552	0.285552
cg13199429	0.164765	0.32488	14	RHOJ		0.160115	0.161115	0.164765	0.168765	0.32488	0.32988
cg26706003	0.548566	0.708668	12	AVPR1A;AVPR1A		0.160101	0.161101	0.548566	0.578566	0.708668	0.739668
cg15328131	0.256022	0.415465	2	ZNF385B;ZNF385B;ZNF385B		0.159443	0.157443	0.256022	0.296022	0.415465	0.453465
cg05407338	0.510766	0.669401	17	ARHGEF15		0.158634	0.158034	0.510766	0.570766	0.669401	0.728801
cg02896361	0.115554	0.27398	X	SYN1;TIMP1;SYN1		0.158426	0.158026	0.115554	0.105554	0.27398	0.26358
cg12768770	0.201236	0.359139	1	SNORD55;SNORD46;RPS8		0.157903	0.157003	0.201236	0.181236	0.359139	0.338239
cg04215511	0.368809	0.526557	16	CNTNAP4		0.157748	0.159748	0.368809	0.348809	0.526557	0.508557
cg12164973	0.060156	0.217795	6	C6orf217;AHI1;AHI1;AHI1;AHI1		0.15764	0.15864	0.060156	0.060156	0.217795	0.218795
cg23783703	0.229836	0.387378	2	MKI67IP		0.157542	0.157142	0.229836	0.219836	0.387378	0.376978
cg02064569	0.432114	0.588705	X	IL1RAPL2		0.156591	0.154591	0.432114	0.402114	0.588705	0.556705
cg12468255	0.461313	0.617801	1	NAV1		0.156488	0.155488	0.461313	0.401313	0.617801	0.556801
cg11104918	0.224628	0.381004	5	DCTN4;DCTN4;DCTN4		0.156376	0.157376	0.224628	0.204628	0.381004	0.362004
cg23939077	0.187835	0.344099	X	TSR2		0.156264	0.156364	0.187835	0.197835	0.344099	0.354199
cg18750937	0.53444	0.69065	12	CAND1		0.15621	0.15021	0.53444	0.68444	0.69065	0.83465
cg06111799	0.111505	0.267402	3	IFT57		0.155896	0.150896	0.111505	0.131505	0.267402	0.282402
cg03136151	0.547196	0.702632	1	BRDT;BRDT		0.155436	0.157436	0.547196	0.577196	0.702632	0.734632
cg14874351	0.123068	0.277833	12	LIN7A		0.154765	0.155765	0.123068	0.120068	0.277833	0.275833
cg21364560	0.0614623	0.216207	10	MYOF;MYOF		0.154745	0.155745	0.0614623	0.0604623	0.216207	0.216207
cg15152149	0.20479	0.359495	6	SERPINB1		0.154705	0.156705	0.20479	0.29479	0.359495	0.451495
cg04424052	0.261057	0.413462	6	PERP		0.152404	0.150404	0.261057	0.261057	0.413462	0.411462
cg14945473	0.253041	0.405159	15	FAM63B;FAM63B		0.152118	0.150118	0.253041	0.243041	0.405159	0.393159
cg06106763	0.16069	0.312752	21	OLIG1;OLIG1		0.152062	0.151062	0.16069	0.15069	0.312752	0.301752
cg12401651	0.153539	0.304489	1	GOLPH3L		0.15095	0.15	0.153539	0.173539	0.304489	0.323539
cg19231082	0.386521	0.537133	3	C3orf1		0.150612	0.150812	0.386521	0.366521	0.537133	0.517333
cg02248486	0.337933	0.488462	7	HOXA5		0.150529	0.149529	0.337933	0.336933	0.488462	0.486462
cg23517115	0.220405	0.370669	5	LOC255167		0.150264	0.152264	0.220405	0.227405	0.370669	0.379669
cg08181476	0.00801202	0.158142	19	NCAN		0.15013	0.15113	0.00801202	0.00801202	0.158142	0.159142
cg11043031	0.128895	0.2786	17	TXNDC17;KIAA0753		0.149705	0.144705	0.128895	0.178895	0.2786	0.3236
cg03575163	0.13239	0.282037	10	C10orf26		0.149647	0.147647	0.13239	0.15239	0.282037	0.300037
cg19996026	0.293418	0.442971	10	CTNNA3;CTNNA3		0.149553	0.148553	0.293418	0.283418	0.442971	0.431971
cg00976692	0.358327	0.507792	11	MEN1;MEN1;MEN1;MEN1;MEN1;MEN1;MEN1;MEN1;MEN1;MEN1		0.149465	0.145465	0.358327	0.348327	0.507792	0.493792
cg12072178	0.267093	0.416366	1	VAMP3		0.149273	0.150273	0.267093	0.257093	0.416366	0.407366
cg13598434	0.172721	0.321903	17	HEXIM1		0.149183	0.150183	0.172721	0.162721	0.321903	0.312903
cg15931047	0.091471	0.240541	5	DIMT1L		0.14907	0.15007	0.091471	0.090471	0.240541	0.240541
cg07777203	0.184438	0.333333	5	DCTN4;DCTN4;DCTN4		0.148895	0.149895	0.184438	0.194438	0.333333	0.344333
cg03854865	0.109576	0.25804	6	HIST1H3E		0.148463	0.146463	0.109576	0.119576	0.25804	0.26604
cg07261848	0.107451	0.255385	3	ACTL6A;ACTL6A;ACTL6A		0.147934	0.147234	0.107451	0.117451	0.255385	0.264685
cg15648345	0.731975	0.878788	17	MKS1;MKS1		0.146813	0.141813	0.731975	0.721975	0.878788	0.863788
cg01262337	0.224056	0.370699	3	TKT;TKT;TKT		0.146643	0.149643	0.224056	0.244056	0.370699	0.393699
cg16325326	0.149949	0.295795	1	ZYG11B		0.145846	0.141846	0.149949	0.169949	0.295795	0.311795
cg20214871	0.434752	0.580182	17	HRNBP3		0.14543	0.14043	0.434752	0.444752	0.580182	0.585182
cg00114383	0.277897	0.422875	16	NFATC2IP		0.144978	0.142978	0.277897	0.267897	0.422875	0.410875
cg26222407	0.330435	0.475287	X	STAG2;STAG2;STAG2;STAG2		0.144852	0.143852	0.330435	0.350435	0.475287	0.494287
cg03093033	0.0984456	0.243289	18	VPS4B		0.144844	0.141844	0.0984456	0.0994456	0.243289	0.241289
cg24479776	0.427443	0.572273	18	DOK6		0.144829	0.147829	0.427443	0.407443	0.572273	0.555273
cg19911179	0.104594	0.249391	X	MCTS1;MCTS1		0.144797	0.148797	0.104594	0.174594	0.249391	0.323391
cg12095167	0.165736	0.310372	8	RAB2A		0.144636	0.134636	0.165736	0.165736	0.310372	0.300372
cg12490816	0.0754973	0.219816	5	C5orf44;TRIM23;C5orf44;C5orf44;TRIM23;C5orf44;TRIM23		0.144319	0.148319	0.0754973	0.0754973	0.219816	0.223816
cg04982619	0.131162	0.274966	16	CYLD;CYLD;CYLD		0.143804	0.149804	0.131162	0.121162	0.274966	0.270966
cg11509733	0.333461	0.476744	X	TSPAN6		0.143284	0.140284	0.333461	0.353461	0.476744	0.493744
cg21694843	0.141745	0.284936	X	CNKSR2;CNKSR2;CNKSR2;CNKSR2		0.143191	0.141191	0.141745	0.151745	0.284936	0.292936
cg20874052	0.175983	0.318977	11	C11orf60;C11orf60		0.142994	0.142194	0.175983	0.120983	0.318977	0.263177
cg15972243	0.224248	0.36705	10	RNLS;RNLS		0.142802	0.132802	0.224248	0.204248	0.36705	0.33705
cg17441280	0.0811629	0.223898	6	MED20;BYSL		0.142735	0.148735	0.0811629	0.0811629	0.223898	0.229898
cg11684211	0.210883	0.353518	Y	TTTY14		0.142635	0.145635	0.210883	0.230883	0.353518	0.376518
cg02813644	0.476071	0.6179	20	SMOX;SMOX;SMOX;SMOX		0.14183	0.14173	0.476071	0.486071	0.6179	0.6278
cg07860992	0.280416	0.421745	3	SSR3		0.141329	0.141129	0.280416	0.200416	0.421745	0.341545
cg23196205	0.737685	0.878182	14	MEG8		0.140497	0.148497	0.737685	0.767685	0.878182	0.916182
cg02825511	0.251267	0.391523	16	VPS4A		0.140256	0.150256	0.251267	0.351267	0.391523	0.501523
cg13372402	0.177784	0.318018	X	LOC550643		0.140234	0.143234	0.177784	0.157784	0.318018	0.301018
cg16111924	0.356388	0.214003	7	SVOPL;SVOPL		-0.142385	-0.144385	0.356388	0.336388	0.214003	0.192003
cg15448616	0.273766	0.129668	14	RGS6;RGS6		-0.144098	-0.145098	0.273766	0.243766	0.129668	0.0986681
cg15644324	0.324841	0.180729	1	HIVEP3;HIVEP3		-0.144112	-0.145112	0.324841	0.344841	0.180729	0.199729
cg14564638	0.459883	0.314888	1	GAS5;SNORD78;SNORD44;SNORD80;SNORD79		-0.144995	-0.145995	0.459883	0.439883	0.314888	0.293888
cg21768287	0.632631	0.487101	X	CD99L2;CD99L2;CD99L2		-0.14553	-0.14653	0.632631	0.652631	0.487101	0.506101
cg26351027	0.190003	0.0427056	8	CA13		-0.147297	-0.146297	0.190003	0.190003	0.0427056	0.0437056
cg00062020	0.781879	0.629289	1	C1orf180		-0.15259	-0.14859	0.781879	0.601879	0.629289	0.453289
cg10385522	0.469526	0.314465	6	HLA-DRB1		-0.155061	-0.151061	0.469526	0.459526	0.314465	0.308465
cg21101465	0.557536	0.399759	13	PDX1		-0.157777	-0.158777	0.557536	0.577536	0.399759	0.418759
cg17218154	0.818921	0.661138	1	KIAA0907		-0.157783	-0.154783	0.818921	0.908921	0.661138	0.754138
cg11412288	0.485367	0.321827	6	DCBLD1		-0.16354	-0.16154	0.485367	0.445367	0.321827	0.283827
cg13392022	0.492333	0.328144	1	ADAR		-0.164189	-0.160189	0.492333	0.442333	0.328144	0.282144
cg24536410	0.299543	0.134615	11	C11orf82;PRCP;PRCP		-0.164927	-0.167927	0.299543	0.309954	0.134615	0.142027
cg07291439	0.63887	0.473151	3	ZIC1		-0.165719	-0.165019	0.63887	0.67887	0.473151	0.513851
cg25954223	0.325683	0.159091	X	CA5B		-0.166593	-0.166593	0.325683	0.345683	0.159091	0.179091
cg02690554	0.718863	0.551782	X	CITED1;CITED1		-0.167081	-0.160081	0.718863	0.638863	0.551782	0.478782
cg24620418	0.762865	0.594625	15	C15orf55		-0.168239	-0.173239	0.762865	0.762865	0.594625	0.589625
cg08688335	0.566194	0.396724	8	GSDMD		-0.16947	-0.16147	0.566194	0.406194	0.396724	0.244724
cg15120477	0.295761	0.125714	2	DNPEP		-0.170046	-0.175046	0.295761	0.277761	0.125714	0.102714
cg27078890	0.329164	0.157261	11	ETS1		-0.171903	-0.162903	0.329164	0.399164	0.157261	0.236261
cg26372060	0.456371	0.280716	8	CYHR1;KIFC2;CYHR1;CYHR1		-0.175655	-0.175155	0.456371	0.496371	0.280716	0.321216
cg26962924	0.504572	0.317482	12	YAF2		-0.18709	-0.18703	0.504572	0.424572	0.317482	0.237542
cg12210543	0.461731	0.260664	19	ZNF844		-0.201068	-0.201868	0.461731	0.421731	0.260664	0.219864
cg23090207	0.451954	0.242188	8	GSDMD		-0.209766	-0.209466	0.451954	0.421954	0.242188	0.212487
cg22168087	0.451957	0.239678	7	HIBADH		-0.21228	-0.24228	0.451957	0.441957	0.239678	0.199678
cg08188471	0.848542	0.633065	6	MRPS18B;C6orf134		-0.215477	-0.225477	0.848542	0.898542	0.633065	0.673065
cg03965138	0.77059	0.543253	19	SIGLEC5		-0.227338	-0.237338	0.77059	0.75059	0.543253	0.513253
cg14972383	0.411215	0.175266	X	IQSEC2;IQSEC2;IQSEC2		-0.235949	-0.225949	0.411215	0.431121	0.175266	0.205173
cg13657785	0.985235	0.746469	4	ZNF876P		-0.238766	-0.228766	0.985235	0.805235	0.746469	0.576469
cg23290207	0.425197	0.173703	2	COBLL1		-0.251494	-0.241494	0.425197	0.455197	0.173703	0.213703
cg24856383	0.729649	0.469496	3	SIAH2;SIAH2		-0.260153	-0.250153	0.729649	0.759649	0.469496	0.509496
cg21692241	0.806572	0.531022	6	HLA-DQA1		-0.27555	-0.26555	0.806572	0.906572	0.531022	0.641022
cg06545389	0.315152	0.0079784	2	CCDC108;CCDC108		-0.307174	-0.327174	0.315152	0.315152	0.0079784	0.0079784
cg02914047	0.806338	0.362792	X	RNF128		-0.443546	-0.473546	0.806338	0.876338	0.362792	0.402792
cg23620433	0.914596	0.456672	14	KIAA0586;TIMM9		-0.457924	-0.507924	0.914596	0.914596	0.456672	0.406672
cg22813794	0.891732	0.118551	7	STYXL1;MDH2;MDH2		-0.773181	-0.713181	0.891732	0.801732	0.118551	0.088551
cg13190986	0.975136	0.119132	12	PXMP2;POLE		-0.856004	-0.906004	0.975136	0.975136	0.119132	0.0691319
